# Supplementary material for: Genomic Hypomethylation in the Human Germline Associates with Selective Structural Mutability in the Human Genome
Source: PubMed Central journal article supplement (PMC3355074; doi:10.1371/journal.pgen.1002692), 2012-05-17
Supplement: pgen.1002692.s028.pdf [file pgen.1002692.s028.pdf]

Table S5

| <b>O: observed, E: expected, R: O/E ratio</b> |               |                                                               |                       |                |
|-----------------------------------------------|---------------|---------------------------------------------------------------|-----------------------|----------------|
| <b>Level</b>                                  | <b>OMIM #</b> | <b>Category name</b>                                          | <b>Statistics</b>     | <b>P-value</b> |
| 1                                             | 300157        | Mental retardation                                            | [O:4; E:0.53; R:7.55] | 1.88E-03       |
| 1                                             | 300220        | Chorioathetosis with mental retardation and abnormal behavior | [O:1; E:0.02; R:50]   | 2.44E-02       |
| 1                                             | 605194        | Double-outlet right ventricle                                 | [O:1; E:0.02; R:50]   | 2.44E-02       |
| 2                                             | 605194        | Heterotaxy, visceral                                          | [O:1; E:0.02; R:50]   | 2.44E-02       |
| 2                                             | 162200        | Melanoma, desmoplastic neurotropic                            | [O:1; E:0.02; R:50]   | 2.44E-02       |
| 1                                             | 300032        | Mental retardation-hypotonic facies syndrome                  | [O:1; E:0.02; R:50]   | 2.44E-02       |
| 2                                             | 300032        | Mental retardation-hypotonic facies syndrome, X-linked        | [O:1; E:0.02; R:50]   | 2.44E-02       |
| 1                                             | 609309        | Muir-Torre syndrome                                           | [O:1; E:0.02; R:50]   | 2.44E-02       |
| 1                                             | 607100        | Nephronophthisis                                              | [O:1; E:0.02; R:50]   | 2.44E-02       |
| 2                                             | 162200        | Neurofibromatosis, familial spinal                            | [O:1; E:0.02; R:50]   | 2.44E-02       |
| 2                                             | 162200        | Neurofibromatosis, type 1                                     | [O:1; E:0.02; R:50]   | 2.44E-02       |
| 1                                             | 162200        | Neurofibromatosis-Noonan syndrome                             | [O:1; E:0.02; R:50]   | 2.44E-02       |
| 1                                             | 162200        | Pseudarthrosis                                                | [O:1; E:0.02; R:50]   | 2.44E-02       |
| 2                                             | 162200        | Pseudarthrosis, tibial                                        | [O:1; E:0.02; R:50]   | 2.44E-02       |
| 3                                             | 162200        | Pseudarthrosis, tibial, in NF1                                | [O:1; E:0.02; R:50]   | 2.44E-02       |
| 3                                             | 314310        | Renal cell carcinoma, papillary, 1                            | [O:1; E:0.02; R:50]   | 2.44E-02       |
| 1                                             | 605194        | Transposition of the great arteries                           | [O:1; E:0.02; R:50]   | 2.44E-02       |
| 1                                             | 162200        | Watson syndrome                                               | [O:1; E:0.02; R:50]   | 2.44E-02       |
| 2                                             | 300203        | Epileptic encephalopathy, early infantile                     | [O:1; E:0.04; R:25]   | 3.63E-02       |
| 1                                             | 605194        | Heterotaxy                                                    | [O:1; E:0.04; R:25]   | 3.63E-02       |
| 1                                             | 603930        | Hyperekplexia                                                 | [O:1; E:0.04; R:25]   | 3.63E-02       |
| 1                                             | 601969        | Medulloblastoma                                               | [O:1; E:0.04; R:25]   | 3.63E-02       |
| 1                                             | 300560        | Mental retardation syndrome                                   | [O:1; E:0.04; R:25]   | 3.63E-02       |
| 2                                             | 300560        | Mental retardation syndrome, X-linked                         | [O:1; E:0.04; R:25]   | 3.63E-02       |
| 2                                             | 300697        | Mental retardation, X-linked syndromic                        | [O:1; E:0.04; R:25]   | 3.63E-02       |
| 1                                             | 603930        | Molybdenum cofactor deficiency                                | [O:1; E:0.04; R:25]   | 3.63E-02       |
| 2                                             | 314310        | Renal cell carcinoma, papillary                               | [O:1; E:0.04; R:25]   | 3.63E-02       |
| 1                                             | 300195        | Alport syndrome                                               | [O:1; E:0.05; R:20]   | 4.81E-02       |
| 1                                             | 300203        | Epileptic encephalopathy                                      | [O:1; E:0.05; R:20]   | 4.81E-02       |
| 2                                             | 162200        | Leukemia, juvenile myelomonocytic                             | [O:1; E:0.05; R:20]   | 4.81E-02       |
